# Supplementary material
Source: publisher figshare collection journal article supplement (https://sage.figshare.com/articles/dataset/_/8313533)

Figure one

An overview of the assessment of Mental Capacity in clinical practice

Start here, and work around clockwise.

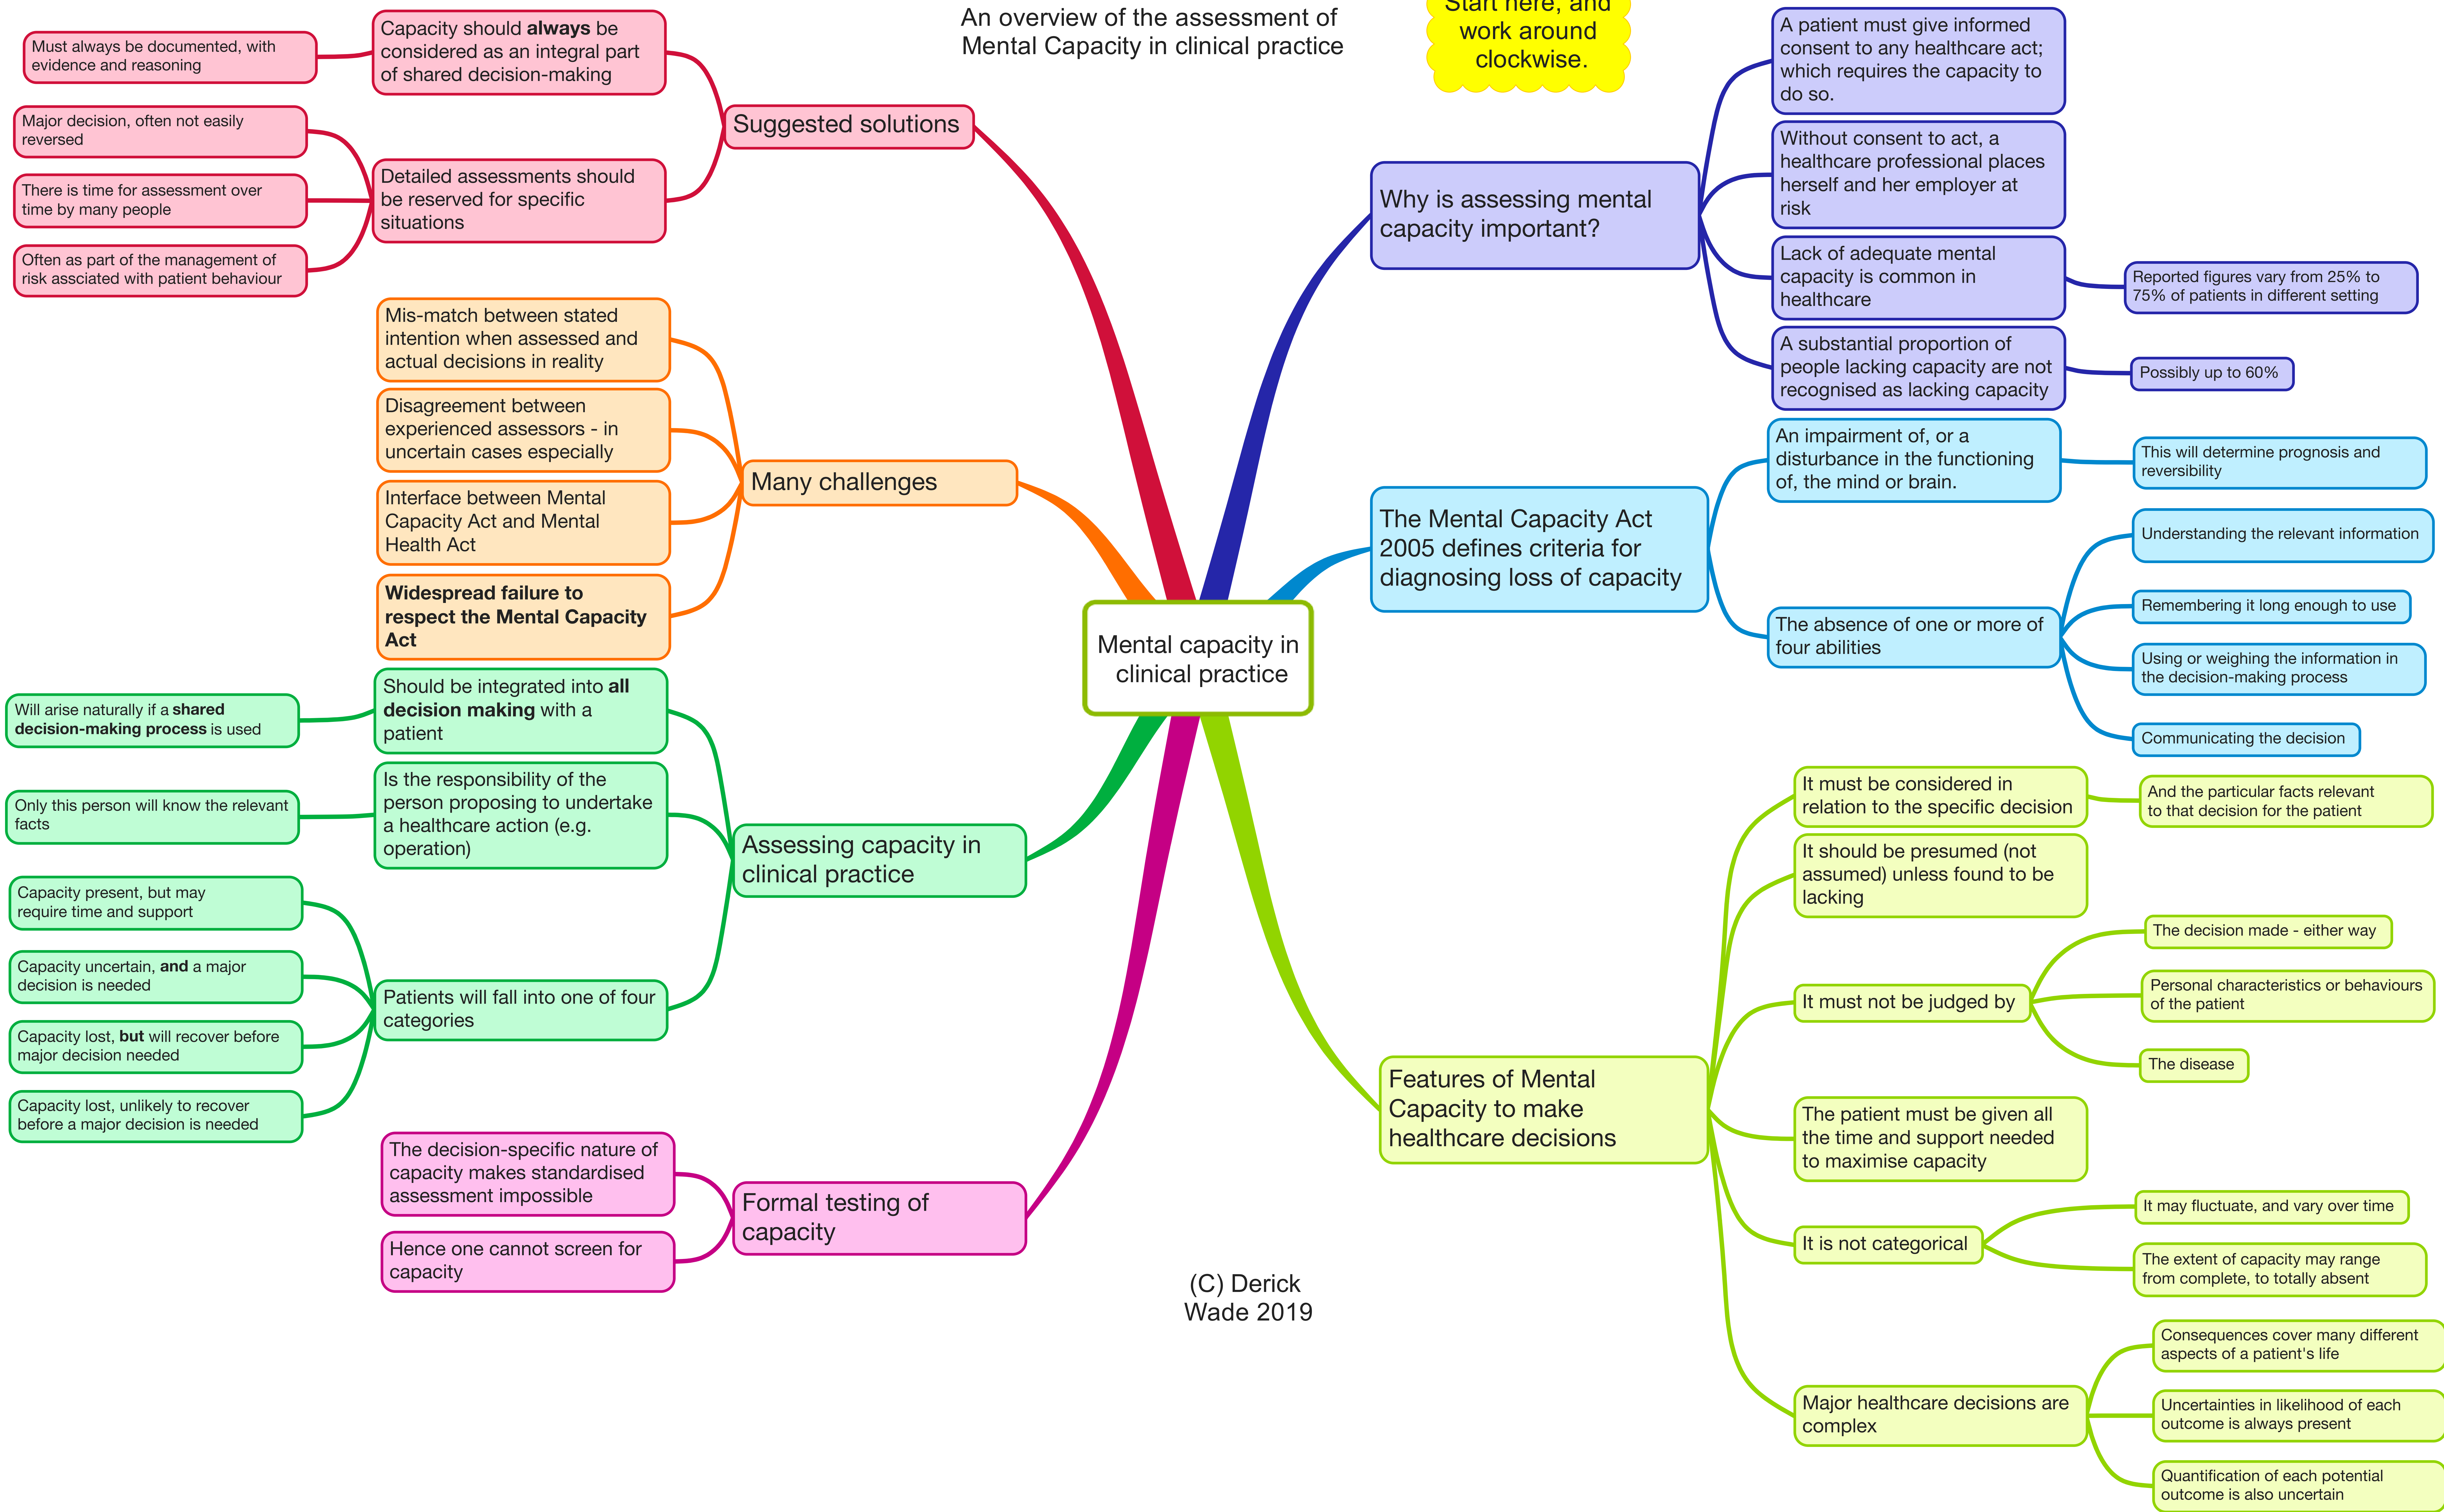

Supplement: Supplementary file 1 [file 15577958]
